# Supplementary material for: SHP2 Inhibition Overcomes RTK-Mediated Pathway Reactivation in KRAS-Mutant Tumors Treated with MEK Inhibitors
Source: Oxford University Press journal article supplement (doi:10.1158/1535-7163.mct-18-0852), 2019-05-08
Supplement: 15357163mct180852-sup-206183_3_supp_5410142_ptmk85.xlsx [file 15357163mct180852-sup-206183_3_supp_5410142_ptmk85.xlsx]

## Sheet: Supplementary Table 2
Supplementary Table 2.
Quantification of p-MEK and tubulin levels and percentages of p-MEK reduction in combo normalized to tubulin in all cell lines tested in Figure 1B-D.
			DMSO	Selumetinib	SHP099	Combo	pMEK reduction in combo
G12C	MIA PaCa-2	pMEK	2	50	1	15
		Tubulin	278	255	260	251
		Normalization	0.00719424	0.196078	0.00384615	0.059761	0.695219
	Calu-1	pMEK	15	76	14	22
		Tubulin	197	216	205	211
		Normalization	0.0761421	0.351852	0.0682927	0.104265	0.703667
	NCI-H1373	pMEK	10	107	9	48
		Tubulin	252	275	259	269
		Normalization	0.0396825	0.389091	0.034749	0.178439	0.541396
	NCI-H358	pMEK	7	48	4	26
		Tubulin	199	217	231	206
		Normalization	0.0351759	0.221198	0.017316	0.126214	0.429409
	NCI-H2030	pMEK	7	112	2	64
		Tubulin	145	140	133	126
		Normalization	0.0482759	0.8	0.0150376	0.507937	0.365079
	NCI-H23	pMEK	5	67	3	43
		Tubulin	171	172	166	167
		Normalization	0.0292398	0.389535	0.0180723	0.257485	0.338994
	SW1463	pMEK	16	84	16	57
		Tubulin	50	61	52	59
		Normalization	0.32	1.37705	0.307692	0.966102	0.298426
	HCC-1171	pMEK	16	312	8	206
		Tubulin	151	157	144	135
		Normalization	0.10596	1.98726	0.0555556	1.52593	0.232146
	LU65	pMEK	9	291	8	251
		Tubulin	98	122	124	132
		Normalization	0.0918367	2.38525	0.0645161	1.90152	0.202801
	NCI-H2122	pMEK	23	502	18	430
		Tubulin	92	100	99	93
		Normalization	0.25	5.02	0.181818	4.62366	0.078953
	NCI-H1792	pMEK	22	272	31	243
		Tubulin	161	155	158	148
		Normalization	0.136646	1.75484	0.196203	1.64189	0.0643631
G12D	KP4	pMEK	1	106	2	65
		Tubulin	285	289	313	308
		Normalization	0.00350877	0.366782	0.00638978	0.211039	0.42462
	LS180	pMEK	14	70	9	38
		Tubulin	119	117	131	96
		Normalization	0.117647	0.598291	0.0687023	0.395833	0.338393
	SK-LU-1	pMEK	9	246	10	179
		Tubulin	156	155	183	165
		Normalization	0.0576923	1.5871	0.0546448	1.08485	0.316457
	A427	pMEK	39	223	22	208
		Tubulin	181	135	153	172
		Normalization	0.21547	1.65185	0.143791	1.2093	0.267911
	AsPc-1	pMEK	36	92	30	67
		Tubulin	98	96	102	80
		Normalization	0.367347	0.958333	0.294118	0.8375	0.126087
G12V	Capan-2	pMEK	2	105	6	41
		Tubulin	269	284	265	255
		Normalization	0.00743494	0.369718	0.0226415	0.160784	0.565117
	Pans 03.27	pMEK	10	159	6	71
		Tubulin	207	210	211	211
		Normalization	0.0483092	0.757143	0.028436	0.336493	0.555575
	DAN-G	pMEK	21	129	14	81
		Tubulin	96	104	101	90
		Normalization	0.21875	1.24038	0.138614	0.9	0.274419
	Capan-1	pMEK	39	305	40	201
		Tubulin	171	264	192	193
		Normalization	0.22807	1.1553	0.208333	1.04145	0.0985475
	COR-L23	pMEK	55	158	54	142
		Tubulin	343	389	391	369
		Normalization	0.16035	0.40617	0.138107	0.384824	0.0525539
G12R/S/A	HUP-T3	pMEK	8	206	7	83
		Tubulin	201	209	190	217
		Normalization	0.039801	0.985646	0.0368421	0.382488	0.611941
	LS123	pMEK	33	170	28	102
		Tubulin	87	87	90	93
		Normalization	0.37931	1.95402	0.311111	1.09677	0.43871
	SW1116	pMEK	91	118	75	80
		Tubulin	62	59	75	72
		Normalization	1.46774	2	1	1.11111	0.444444
	PSN1	pMEK	62	329	66	342
		Tubulin	224	213	230	183
		Normalization	0.276786	1.5446	0.286957	1.86885	0
Q61L	SW948	pMEK	2	64	2	18
		Tubulin	136	138	137	147
		Normalization	0.0147059	0.463768	0.0145985	0.122449	0.735969
Q61H	T3M-4	pMEK	7	113	13	56
		Tubulin	130	112	114	98
		Normalization	0.0538462	1.00893	0.114035	0.571429	0.433628
	NCI-H460	pMEK	10	116	10	83
		Tubulin	178	186	178	182
		Normalization	0.0561798	0.623656	0.0561798	0.456044	0.268757
	HCC2108	pMEK	16	305	17	232
		Tubulin	112	159	130	141
		Normalization	0.142857	1.91824	0.130769	1.64539	0.142239
G13D	NCI-H1944	pMEK	3	49	3	39
		Tubulin	99	100	125	116
		Normalization	0.030303	0.49	0.024	0.336207	0.313863
	NCI-H747	pMEK	13	156	11	133
		Tubulin	127	129	115	140
		Normalization	0.102362	1.2093	0.0956522	0.95	0.214423
	NCI-H647	pMEK	6	95	3	77
		Tubulin	145	148	142	145
		Normalization	0.0413793	0.641892	0.0211268	0.531034	0.172704
	LoVo	pMEK	46	304	33	240
		Tubulin	159	127	121	113
		Normalization	0.289308	2.3937	0.272727	2.12389	0.112715
	HCT 116	pMEK	8	278	9	234
		Tubulin	176	172	168	154
		Normalization	0.0454545	1.61628	0.0535714	1.51948	0.0598898
NRAS Q61	IPC-298	pMEK	4	85	4	73
		Tubulin	109	113	109	109
		Normalization	0.0366972	0.752212	0.0366972	0.669725	0.10966
	MM415	pMEK	4	101	6	86
		Tubulin	85	94	82	90
		Normalization	0.0470588	1.07447	0.0731707	0.955556	0.110671
	Hs 944.T	pMEK	6	62	6	59
		Tubulin	212	225	220	230
		Normalization	0.0283019	0.275556	0.0272727	0.256522	0.0690743
	SK-MEL-30	pMEK	17	79	20	86
		Tubulin	245	226	231	236
		Normalization	0.0693878	0.349558	0.0865801	0.364407	0
	SK-MEL-2	pMEK	6	86	7	86
		Tubulin	273	300	279	287
		Normalization	0.021978	0.286667	0.0250896	0.299652	0
